# Supplementary material for: Comparative transcriptome analysis reveals the growth and development in larval stages of the swimming crab Portunus trituberculatus
Source: Frontiers journal article supplement (doi:10.3389/fmars.2023.1172214), 2023-06-23
Supplement: Table_1.docx [file Table_1.docx]

**Table S1.**

Primer information for the qRT-PCR.

| Primer ID | Forward（5’-3’） | Reverse（5’-3’） |
| --- | --- | --- |
| PER | GTGTACGGCTCCGACGAGA | GCCAGCAAGGAAGCATTTAG |
| CBA | TGTGGAAGGTATGGTGCTCTG | CAGCATTTGTGTTACTTTTGGGT |
| HSP | CCCAGGAGGAGTATGGAGAGT | AAAGAGGTCAAAGGGAGCACG |
| PDS | GGCTATCTCTCGCTCCATTG | CTTCGCCCTCCACTCCTTG |
| PK | GTAGACTGTTTGGTGATGCTTGG | CATTAGCCAACCACACCCATT |
| RPL18 | GCACTGTCACCGATGACCTC | CCTTGCACCAGCAGAGTGTT |

**Table S2.**

The stability of RPL-18 during the development of *P. trituberculatus* larvae*.*

| Development stage | Z1 | Z2 | Z3 | Z4 | M | C |
| --- | --- | --- | --- | --- | --- | --- |
| 60S ribosomal protein L18(RPL-18) | 17.57±0.05 | 17.62±0.06 | 17.65±0.09 | 17.68±0.06 | 17.62±0.11 | 17.55±0.05 |

Values represent the standard expressions measured by Microarray sequencing

**Table S3.**

The information of the 16 DEGs during the development of *P. trituberculatus* larvae in Figure 2C*.*

| Probe ID | Target ID | Description |
| --- | --- | --- |
| CUST_35029_PI429384579 | IE2IK4G02IVGGZ | unknown |
| CUST_38305_PI429384491 | contig07634 | solute carrier family 15 member 1-like (LOC123504113), transcript variant X2, mRNA |
| CUST_25862_PI429384588 | GT558198.1 | UDP-glucosyltransferase 2-like (LOC123506105), transcript variant X3, misc_RNA |
| CUST_44350_PI429384574 | IE2IK4G02GFPBL | Uncultured bacterium clone Ovdat62b10 16S ribosomal RNA gene, partial sequence |
| CUST_30589_PI429384588 | GT558198.1 | UDP-glucosyltransferase 2-like (LOC123506105), transcript variant X3, misc_RNA |
| CUST_33556_PI429384588 | GT559851.1 | solute carrier family 15 member 1-like (LOC123504113), transcript variant X2, mRNA |
| CUST_15235_PI429384588 | GW400403.1 | uncharacterized LOC123516137 (LOC123516137), mRNA |
| CUST_30060_PI429384588 | GT558413.1 | uncharacterized LOC123512209 (LOC123512209), mRNA |
| CUST_34415_PI429384584 | IE2IK4G01BU1N8 | Piscicola geometra genome assembly, chromosome: 15 |
| CUST_39877_PI429384588 | GT558717.1 | uncharacterized LOC123508727 (LOC123508727), ncRNA |
| CUST_22178_PI429384588 | GW401973.1 | haplotype BE D-loop, partial sequence; mitochondrial |
| CUST_37098_PI429384570 | IE2IK4G02JLPLF | uncharacterized LOC123502626 (LOC123502626), mRNA |
| CUST_95292_PI429384491 | contig14968 | unknown |
| CUST_26125_PI429384579 | IE2IK4G01BGDFS | unknown |
| CUST_31800_PI429384588 | GT555861.1 | protein obstructor-E-like (LOC123511490), transcript variant X1, mRNA |

All of the above differential genes can encode protein

**Table S4.**

Differentially expressed genes in“AMPK signaling pathway”term between the forth zoeae (Z4) and the magalopae (M) of *P. trituberculatus.*

| Comparison | Gene name | Unigene ID | Fold Change |
| --- | --- | --- | --- |
| Z4_vs_M | glucose-6-phosphatase(G6PC)* | contig20533 | 13.9 |
|  | phosphoenolpyruvate carboxykinase （PCK)* | contig03971 | 7.7 |
|  | macrophage-stimulating protein receptor-like isoform X1 | IE2IK4G02FTLZL | 6.4 |
|  | transforming growth factor beta-activated kinase 1（TGF-β-activated kinase 1） | IE2IK4G01CH56N | 4.6 |
|  | sterol regulatory element-binding protein 1 | contig10222 | 3.0 |
|  | 6-phosphofructo-2-kinase/fructose-2,6-bisphosphatase 2* | IE2IK4G01CCC1G | 2.4 |
|  | 6-phosphofructo-2-kinase/fructose-2,6-bisphosphatase 1 isoform X1 | IE2IK4G02GLIGI | 2.0 |

* *P* value＜0.001. For genes without asterisks, *P* value ＜0.05

**Table S5.**

Differentially expressed genes in“retinol metabolism”term between the forth zoeae (Z4) and the magalopae (M) of *P. trituberculatu*s.

| Comparison | Gene name | Unigene ID | Fold Change |
| --- | --- | --- | --- |
| M_vs_Z4 | cytochrome P450 enzyme* | contig08218 | 52.5 |
|  | retinol dehydrogenase 12 isoform X3(RDH12)* | contig20898 | 47.2 |
|  | retinoid isomerohydrolase* | IE2IK4G02IKWNO | 34.9 |
|  | hypothetical protein C0J52_16171* | IE2IK4G02HSPNX | 25.4 |
|  | UDP-glucuronosyltransferase* | IE2IK4G01EARN0 | 25.3 |
|  | UDP-glucuronosyltransferase- isoform X3* | contig08276 | 22.0 |
|  | retinol dehydrogenase 13-like isoform X6* | IE2IK4G01ALEJA | 19.6 |
|  | beta,beta-carotene 9',10'-oxygenase-like isoform X1(CMO2)* | IE2IK4G02GNM4G | 17.2 |
|  | Epidermal retinal dehydrogenase 2* | contig12808 | 9.8 |
|  | cytochrome P450 6k1* | IE2IK4G01AZBUZ | 7.9 |
|  | beta,beta-carotene 9',10'-oxygenase(CMO2) | IE2IK4G01CYQ4A | 7.6 |
|  | cytochrome P450 9E1 | IE2IK4G01DGL7U | 5.6 |
|  | UDP-glucuronosyltransferase 2C1* | IE2IK4G01CP94Z | 5.6 |
|  | alcohol dehydrogenase class-3 | IE2IK4G01DHEKE | 5.3 |
|  | Retinol dehydrogenase 13(RDH13) | contig14383 | 5.0 |
|  | alcohol dehydrogenase class -3, partial* | contig18148 | 3.9 |
|  | cytochrome P450 3A24 | contig11426 | 2.9 |
|  | short-chain dehydrogenase/reductase family 16C member 6-like | IE2IK4G01CIQ4C | 2.5 |
|  | Retinol dehydrogenase 14(RDH14) | contig12426 | 2.3 |
|  | retinol dehydrogenase 11(RDH11) | contig12804 | 2.3 |

* *P* value＜0.001. For genes without asterisks, *P* value ＜0.05

**Table S6.**

Differentially expressed genes in“Insect hormone biosynthesis” term and IAG gene between the forth zoeae (Z4) and the magalopae (M) of *P. trituberculatu*s.

| Comparison | Gene name | Unigene ID | Fold Change |
| --- | --- | --- | --- |
| M_vs_Z4 | cytochrome P450(CYP15)* | IE2IK4G02HI3HE | 65.5 |
|  | CYP2* | contig15890 | 30.1 |
|  | cytochrome P450 302a1, mitochondrial* | IE2IK4G01AU1I1 | 27.9 |
|  | CYP2* | contig06017 | 19.7 |
|  | juvenile hormone epoxide hydrolase(JHEH)* | contig21677 | 15.6 |
|  | cytochrome P450 epoxidase* | contig19499 | 7.9 |
|  | probable cytochrome P450 49a1* | IE2IK4G02GQT1N | 3.3 |
|  | CYP307, partial | IE2IK4G01EPD0Z | 3.0 |
|  | cytochrome P450 CYP2 | IE2IK4G02GXSUT | 2.2 |
| M_vs_Z4 | insulin-like androgenic gland hormone* | contig11412 | 3.2 |

* *P* value＜0.001. For genes without asterisks, *P* value ＜0.05
